# Supplementary material for: The impact of agriculture on tropical mountain soils in the western Peruvian Andes: a pedo-geoarchaeological study of terrace agricultural systems in the Laramate region (14.5° S)
Source: Copernicus journal article supplement (doi:10.5194/soil-10-727-2024), 2024-10-14
Supplement: Supplementary file 1 [file soil-10-727-2024-supplement.zip]

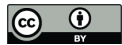

*Supplement of*

**The impact of agriculture on tropical mountain soils in the western Peruvian Andes: a pedo-geoarchaeological study of terrace agricultural systems in the Laramate region (14.5° S)**

**Fernando Leceta et al.**

*Correspondence to:* Fernando Leceta (leceta@gmail.com) and Julia Meister (julia.meister@uni-wuerzburg.de)

- soil-10-727-2024-supplement-title-page.pdf
- Figure\_S1.jpg
- Figure\_S2.jpg
- Supplementary Table - Pedochemical - Phytoliths - Starch analysis.xlsx

The copyright of individual parts of the supplement might differ from the article licence.
