# Supplementary material for: The impact of agriculture on tropical mountain soils in the western Peruvian Andes: a pedo-geoarchaeological study of terrace agricultural systems in the Laramate region (14.5° S)
Source: Copernicus journal article supplement (doi:10.5194/soil-10-727-2024), 2024-10-14
Supplement: Supplementary file 1 [file soil-10-727-2024-supplement.zip]

## Sheet: Supplementary Table S1
	Supplementary Table S1: Pedochemical analysis
	Sample context	Sample ID	Horizon	Depth [cm]	Munsell color (moist)	Particle size >2mm [%]	Sand 0.063-2mm [%]	Silt 2-63μm [%]	Clay <2μm [%]	Soil textural class	Bulk density [g/cm³]	Packing density (PD)	promoting root growth <	affecting root growth	> restricting root growth	Soil porosity [%]	pH (KCl)	N [%]	C [%]	S [%]	Corg [%]	OM [%]	C:N	[cmolc Ca2+/kg]	[cmolc K+/kg]	[cmolc Mg2+/kg]	[cmolc Na+/kg]	[cmolc H+/kg]	[cmolc Fe3+/kg]	[cmolc Mn2+/kg]	[cmolc Al3+/kg]	CECpot [cmolc/kg]	Base saturation [%]	[mg Fed/g]	[mg Feox/g]	Feox/Fed	Alox+1/2 Feox [%]	[mg Al/g]	[mg Ca/g]	[µg Cd/g]	[mg Cd/g]	[mg Fe/g]	[mg K/g]	[mg Mg/g]	[mg Mn/g]	[mg Na/g]	[mg Zn/g]	Ptot [mg/g]	Pava [mg/g]
	Phaeozem near Laramate	Pe09-02/1	Ah1	0-15	7.5 YR 2.5/2	7.6	32.0667	25.1105	42.8228	Clay	1.37038	1.75578	1.1	1.39	1.47	48.2877	5.25	0.107	0.991	0.035	1.03453	2.06905	9.26168	28.1756	0.676279	2.17578	0.258548	0.00139483	0.00262379	0.010273	0	31.3005	99.9543	5.73358	1.00435	0.17517	0.201244	56.1456	13.5973	0.153718	0.000153718	42.2502	2.89233	12.0622	0.6267	2.09279	0.0759114	0.442859	0.1021
		Pe09-02/2	Ah2	15-50	7.5 YR 3/3	8.8	28.3118	29.5787	42.1094	Clay	1.56175	1.94073	1.1	1.39	1.47	41.0662	5.27	0.074	0.699	0.028	0.792663	1.58533	9.44595	29.9074	0.587036	1.88866	0.374899	0.00133206	0.00262379	0.00447858	0	32.7664	99.9743	6.09071	0.748837	0.122947	0.198958	61.0791	14.0974	0.115491	0.000115491	43.7753	2.16581	12.2659	0.631174	2.32547	0.180404	0.394843	0.1003
		Pe09-02/3	C	60-90	10 YR 5/1	ND	97.6612	2.04296	0.295843	Sand	ND	ND	ND	ND	ND	ND	5.1	0.004	0.027	0.033	0	0	6.75	20.4909	0.218907	0.704287	0.139977	0.00197026	0.000961412	0.00323692	0	21.5602	99.9714	2.06214	0.161921	0.0785208	0.0584913	27.6596	9.5032	0.0628907	6.28907e-05	28.6266	4.4921	13.0955	0.4808	0.8673	0.0483	0.570427	0.2289
	Andosol near Pucará	Pe10-32/1	Ah1	0-5	10 YR 3/4	20.1931	37.7319	39.0508	23.2173	Loam	1.06035	1.26931	1.4	1.63	1.8	60.9776	4.13	0.404	3.856	0	3.7575	7.515	9.54455	4.35232	1.78433	1.30851	0.0221962	0.0183875	0.0109427	0.210913	0.021068	7.71028	96.8494	7.25248	2.75231	0.3795	0.386862	29.5968	2.12605	1.21858	0.00121858	27.2498	2.89883	2.43115	0.796033	0.256036	0.0834429	0.776433	0.0903
		Pe10-32/2	Ah2	5-20	7.5 YR 4/4	1.93729	15.2717	44.4717	40.2566	Silty clay	1.01491	1.37722	1.1	1.49	1.58	63.1688	3.73	0.3	2.2	0	1.94671	3.89342	7.33333	3.27588	1.64244	1.00322	0.05553	0.0461873	0.00666892	0.118007	0.0139654	6.11571	97.733	10.3608	4.64179	0.448013	0.56668	46.5387	1.55185	0.709781	0.000709781	31.4341	3.69486	2.83896	1.40041	0.266645	0.105676	0.968424	0.0436
		Pe10-32/3	2Ahb	20-30	7.5 YR 2/3	19.0326	65.5336	19.9393	14.5271	Sandy loam (clay-rich)	1.30272	1.43346	1.4	1.63	1.8	53.5846	4.07	0.265	1.915	0	1.77142	3.54283	7.22642	1.46293	0.876251	0.392633	0.0363939	0.0211117	0.00666892	0.0062612	0.0658403	2.84698	97.2332	5.76895	3.54766	0.614957	0.5995	24.8918	0.862486	0.717288	0.000717288	20.706	1.79961	1.72037	0.301032	0.214093	0.0541232	0.968911	0.1009
		Pe10-32/4	2Bwt	30-50	7.5 YR 5/6	26.6952	69.5722	14.1399	16.2878	Sandy loam (clay-rich)	1.28757	1.43416	1.4	1.63	1.8	54.5373	3.81	0.156	0.513	0	0.409613	0.819225	3.28846	4.7489	0.620855	1.49169	0.0900983	0.0384169	0.0109427	0.0010637	0.00455548	6.96811	99.7623	6.71438	3.38837	0.504644	0.355261	31.1544	1.32245	0.110782	0.000110782	69.6433	1.37109	2.12743	0.711979	0.24568	0.107869	0.375612	0.0394
		Pe10-32/5	2C1	50-80	7.5 YR 6/3	40.3593	60.1588	23.963	15.8782	Sandy loam (clay-rich)	ND	ND	ND	ND	ND	ND	3.25	0.057	0.195	0	0.130182	0.260364	3.42105	8.31815	0.25195	2.9571	0.156149	0.139483	0.00666892	0.0277009	0.000665392	11.7184	99.701	1.64928	0.491371	0.297931	0.0996828	33.3693	2.13075	0.145939	0.000145939	15.3557	1.20749	2.64046	0.422514	0.235498	0.0506106	0.0911833	0.0111
	Anthrosol at Santa María system	Pe10-26/1	Ap	0-15	10 YR 2/3	13.9075	75.5684	16.6217	7.80993	Sandy loam (clay-poor)	1.52946	1.59975	1.4	1.63	1.8	41.5045	5.53	0.124246	0.905761	0	0.960541	1.92108	7.29006	6.55052	0.695828	1.45598	0.0314861	0.000732019	0	0.0435945	0.000187575	8.77759	99.5012	2.94316	0.542923	0.184469	0.100855	15.5826	7.71581	0.418632	0.000418632	27.8559	7.1469	8.04603	0.468288	1.29735	0.0689104	1.33237	ND
		Pe10-26/2	Ah	15-40	10 YR 3/2	20.2151	77.6369	13.0412	9.32192	Sandy loam (clay-poor)	1.3483	1.4322	1.4	1.63	1.8	43.3717	5.88	0.06239	0.306268	0	0.278478	0.556957	4.90893	7.43615	0.561722	1.53764	0.0402276	0.000326981	0	0.0149503	0	9.59069	99.8441	3.16368	0.521417	0.164813	0.103731	20.2123	7.44771	0.345741	0.000345741	38.0567	8.52951	10.4323	0.566161	1.19083	0.0731498	1.26214	ND
		Pe10-26/3	AC	40-60	10 YR 3/3	24.1811	77.4858	14.9153	7.59888	Sandy loam (clay-poor)	1.45155	1.51994	1.4	1.63	1.8	44.6674	6.38	0.044692	0.253359	0	0.235432	0.470865	5.669	8.57482	0.487219	1.25181	0.0523311	0.0001034	0	0.00295977	0	10.3691	99.9715	3.10929	0.414984	0.133466	0.109493	19.701	7.82936	0.345364	0.000345364	35.2706	6.66629	9.06721	0.557003	1.13767	0.0628882	1.37851	ND
		Pe10-26/4	C1	60-100	10 YR 2/3	15.8293	76.711	16.6386	6.65041	Sandy loam (clay-poor)	ND	ND	ND	ND	ND	ND	7.28	0.041612	0.270362	0	0.225173	0.450347	6.49721	10.3461	0.479769	0.965983	0.0624174	1.30173e-05	0	0.000961336	0	11.8552	99.9919	3.1111	0.286995	0.0922487	0.0972823	18.4574	8.09874	0.398902	0.000398902	33.5294	6.90622	8.30537	0.546518	1.22654	0.0628006	1.49643	ND
		Pe11-06/1	Ap	0-15	10 YR 3/2	13.2783	55.0914	26.4408	18.4679	Sandy loam (clay-rich)	1.53486	1.70107	1.4	1.6	1.75	41.4664	5.88	0.101299	1.18043	0.0232959	1.14682	2.29364	11.6529	12.4348	1.8923	2.58616	0.107443	0.000326981	0.0030693	0.0271144	0.000892417	17.0518	99.8178	5.09013	0.554257	0.108889	0.137994	30.2494	12.7466	0.700941	0.000700941	34.0385	8.98726	9.32223	0.534879	2.00153	0.192556	2.47465	1.699
		Pe11-06/2	Ah	15-30	10 YR 3/2	14.6536	54.7536	25.8842	19.3623	Sandy loam (clay-rich)	1.30752	1.48178	1.4	1.6	1.75	46.7443	6.3	0.0791864	1.01383	0.0208614	0.996681	1.99336	12.8031	13.8979	1.07328	2.55678	0.15758	0.000124315	0.0030693	0.0185921	0.000485153	17.7077	99.8749	5.18034	0.482089	0.0930614	0.149695	30.3191	13.2214	0.670204	0.000670204	33.4657	8.60864	9.12562	0.52476	2.08139	0.193837	2.47484	1.6924
		Pe11-06/3	AC	30-60	10 YR 3/4	15.456	56.6409	23.4513	19.9078	Sandy clay loam	1.53923	1.7184	1.4	1.6	1.75	35.7311	7.4	0.0470545	0.519242	0.0226741	0.405224	0.810448	11.0349	19.5064	0.934198	2.43925	0.4188	9.87467e-06	0.0030693	0.0129105	0.000341584	23.3149	99.93	6.10307	0.482388	0.0790402	0.146126	38.9176	12.7669	0.610349	0.000610349	37.6352	9.38513	9.186	0.535733	1.83696	0.178631	1.69659	0.8719
	Anthrosol at Ayllapampa system	Pe10-30/1	Ap1	0-8	10 YR 2/3	23.5256	45.5585	33.3799	21.0617	Loam	ND	ND	ND	ND	ND	ND	5.71	0.335	3.342	0	3.27218	6.54435	9.97612	13.003	2.73411	2.2318	0.0153481	0.00048364	0.00734826	0.122199	0.00126218	18.1151	99.2779	5.431	1.64581	0.30304	0.171437	25.5865	5.17828	0.862596	0.000862596	21.4588	3.51573	3.36464	0.684747	0.296539	0.0796643	1.06448	ND
		Pe10-30/2	Ap2	8-35	10 YR 2/3	25.6986	48.9186	29.3193	21.7621	Loam	ND	ND	ND	ND	ND	ND	5.28	0.173	1.396	0	1.29882	2.59765	8.06936	13.1295	1.72831	2.2318	0.0227447	0.00130173	0.00734826	0.0349347	0.000447733	17.1551	99.7509	5.69896	1.21365	0.21296	0.13588	28.3682	4.8354	0.592486	0.000592486	24.2873	2.83707	3.41542	0.672892	0.285924	0.0718221	1.11003	ND
		Pe10-30/3	Ah1	35-65	10 YR 2/3	38.8912	46.8003	28.382	24.8177	Loam	ND	ND	ND	ND	ND	ND	5.43	0.131	1.165	0	1.09826	2.19652	8.89313	13.5091	1.24404	2.39513	0.0308137	0.000921558	0.00241143	0.0429284	0.000153216	17.2245	99.7359	5.69874	1.04417	0.183228	0.123506	28.6495	5.53677	0.541117	0.000541117	26.0764	3.2433	3.79075	0.675173	0.297456	0.073492	1.14717	ND
		Pe10-30/4	Ah2	65-100	10 YR 2/3	35.4036	45.5023	28.8942	25.6035	Loam	ND	ND	ND	ND	ND	ND	5.54	0.154	1.209	0	1.10984	2.21967	7.85065	14.9008	1.39305	2.47679	0.0462793	0.000715357	0.00241143	0.0302716	0.000135777	18.8497	99.8259	5.76831	1.18965	0.206239	0.143034	28.1544	5.8699	0.609689	0.000609689	20.9228	2.67245	3.62907	0.557382	0.318074	0.0662545	1.21023	ND
		Pe11-07/1	Ap	0-25	10 YR 3/1	21.9966	35	60	5	Silt loam (clay-poor)	1.31736	1.36236	1.4	1.6	1.75	50.2883	5.1	0.150943	1.65938	0.0232575	1.61216	3.22433	10.9935	9.75247	1.98502	1.67529	0.0399517	0.00197026	0.010167	0.129856	0.00389978	13.5967	98.9415	4.20959	1.17582	0.279319	0.153149	21.6074	3.2289	0.424237	0.000424237	18.3877	2.99666	2.55161	0.533426	0.371401	0.103762	0.378311	0.1097
		Pe11-07/2	Ah	25-50	10 YR 2/1	26.9006	35	60	5	Silt loam (clay-poor)	1.22193	1.26693	1.4	1.6	1.75	53.8895	5.26	0.111347	1.37142	0.0204084	1.22901	2.45802	12.3166	11.9471	1.15054	1.9985	0.0539321	0.00136308	0.00484372	0.057416	0.00105956	15.2134	99.5838	4.71502	1.17603	0.249422	0.16495	26.4935	4.0137	0.371248	0.000371248	21.9638	2.39041	2.83004	0.512831	0.283598	0.116802	0.348652	0.0714
		Pe11-07/3	AC	50-60	10 YR 2/2	24.3781	35	60	5	Silt loam (clay-poor)	ND	ND	ND	ND	ND	ND	5.27	0.103697	1.1265	0.020818	1.00212	2.00425	10.8634	11.2156	0.903291	2.20418	0.0577888	0.00133206	0.00661814	0.0332694	0.000905172	14.4216	99.7171	4.80547	1.05522	0.219587	0.151126	25.8138	3.84383	0.271445	0.000271445	20.8733	2.05126	2.54476	0.458675	0.270069	0.108649	0.30057	0.0585
		Pe11-07/4	C	60-90	7.5 YR 3/2	66.2483	60	35	5	Sandy loam (clay-poor)	1.39512	1.44012	1.4	1.63	1.8	47.354	5.06	0.0617738	0.600214	0.0155437	0.498473	0.996947	9.71632	9.50862	0.671493	2.02789	0.064538	0.00216034	0.00484372	0.0204859	0.00105706	12.2989	99.7855	3.79476	0.531078	0.13995	0.102612	24.7358	2.60441	0.113641	0.000113641	17.3762	1.72557	2.18404	0.281455	0.20798	0.101203	0.165318	0.0374
	Anthrosol at Sihuilca system	Pe10-31/1	Ap1	0-10	10 YR 3/3	24.682	36.7512	38.0435	25.2053	Loam	ND	ND	ND	ND	ND	ND	6.08	0.254	1.897	0	1.76085	3.52171	7.4685	10.5176	2.63565	3.01816	0.0425668	0.000206311	0.00453201	0.095918	0.00035279	16.3148	99.3821	4.48672	1.03287	0.230207	0.138992	27.7839	6.09848	0.862815	0.000862815	30.0139	4.56029	3.99263	0.755874	0.666159	0.0698217	0.592238	0.3624
		Pe10-31/2	Ap2	10-20	10 YR 3/3	25.5178	31.9131	39.9511	28.1358	Clay loam	ND	ND	ND	ND	ND	ND	5.52	0.155	1.157	0	1.087	2.17401	7.46452	11.3108	2.3235	3.07921	0.0715796	0.00074907	0.00453201	0.064733	0.000158383	16.8545	99.5881	4.41943	0.828543	0.187477	0.132594	30.3208	5.9821	0.67541	0.00067541	28.8663	4.69985	4.25037	0.708901	0.602637	0.0655229	0.532039	0.3624
		Pe10-31/3	Ah	20-50	10 YR 2/3	25.4171	32.3844	38.7047	28.9109	Clay loam	ND	ND	ND	ND	ND	ND	5.36	0.121	0.869	0	0.755039	1.51008	7.18182	10.0644	1.16002	2.59075	0.0820736	0.00108274	0.00453201	0.0393952	8.6045e-05	13.9412	99.6843	4.82509	0.719635	0.149144	0.112663	28.953	4.38726	0.642953	0.000642953	31.7086	3.56918	3.68022	0.790656	0.47617	0.068377	0.347624	0.0748
		Pe10-31/4	Bwt	50-70	10 YR 2/3	19.276	30.5427	38.4388	31.0185	Clay loam	ND	ND	ND	ND	ND	ND	5.56	0.134	0.916	0	0.816305	1.63261	6.83582	10.7442	0.847874	2.89604	0.0962713	0.00068316	0.00239509	0.0160065	5.89183e-05	14.6029	99.8736	4.75368	0.551357	0.115985	0.118792	33.1816	4.39864	0.6059	0.0006059	31.2215	4.57075	4.20981	0.745909	0.51969	0.0692682	0.264492	0.047
		Pe10-31/5	C1	70-85	10 YR 2/3	14.2391	35.1424	36.6019	28.2557	Clay loam	ND	ND	ND	ND	ND	ND	5.65	0.129	0.824	0	0.782828	1.56566	6.3876	10.8575	0.67761	3.20133	0.12837	0.000555293	0.00239509	0.0309493	7.0544e-05	14.8982	99.7757	4.61859	0.587795	0.127267	0.126996	32.5535	4.83972	0.458335	0.000458335	30.5516	3.28411	3.72949	0.696817	0.549594	0.0669066	0.265727	0.04
	Anthrosol at Chaupicancha system	Pe10-25/1	Ap	0-15	10 YR 3/3	13.2479	76.2305	14.1695	9.6	Sandy loam (clay-poor)	1.55852	1.64492	1.4	1.63	1.8	43.872	6	0.059576	0.373278	0	0.389201	0.778402	6.26558	5.7914	0.770332	1.66014	0.057038	0.00024804	0	0.0289394	3.22003e-06	8.30785	99.6516	3.38748	0.414922	0.122487	0.105263	15.2268	5.21492	0.237094	0.000237094	38.698	5.7986	6.69808	0.557558	0.950209	0.0477786	0.660167	0.2715
		Pe10-25/2	Ah	15-45	10 YR 3/3	15.4964	80.1873	11.8283	7.98441	Loamy sand	1.4206	1.49246	1.6	1.69	1.8	46.3602	6.12	0.039673	0.215992	0	0.188303	0.376605	5.44431	5.15881	0.479769	1.49681	0.0435896	0.000188158	0.00241143	0.0096212	3.42693e-05	7.19104	99.8322	3.27859	0.308272	0.0940259	0.0699206	15.4909	4.93642	0.178111	0.000178111	31.3638	5.67653	6.32574	0.411783	1.00511	0.0450424	0.528044	0.2697
		Pe10-25/3	AB	45-80	10 YR 3/3	14.3125	86.4507	7.53093	6.0184	Loamy sand	1.53549	1.58965	1.6	1.69	1.8	41.6925	6.01	0.02769	0.180432	0	0.157309	0.314617	6.51614	4.90577	0.248808	1.49681	0.069814	0.000242394	0.00487985	0.0102873	1.55104e-05	6.73638	99.7746	3.78059	0.286963	0.0759043	0.0518483	13.7776	4.83356	0.164064	0.000164064	58.9689	6.66364	7.06372	0.692839	0.87645	0.058731	0.578456	0.191
		Pe10-25/4	Bwt	80-120	10 YR 3/4	18.6119	66.6605	16.2504	17.0891	Sandy loam (clay-rich)	ND	ND	ND	ND	ND	ND	5.82	0.03676	0.177878	0	0.1303	0.2606	4.8389	8.19526	0.382914	2.64013	0.124952	0.000375424	0.00241143	0.0142842	0	11.36	99.853	4.45231	0.329581	0.0740247	0.0755666	32.4193	5.0216	0.148084	0.000148084	43.7339	6.91448	7.5652	0.566612	0.668337	0.057365	0.47153	0.1463
	ND: data not available
[truncated: 2 more columns]

## Sheet: Supplementary Table S2
	Supplementary Table S2: Sample information and results of starch analyses in the Laramate terrace complex.
	Sample context	Profile and sample ID	Soil horizon	Horizon depth (cm)	Starch (Zea Mays)
	Andosol near Pucará (control profile)	Pe10/32-3	2Ahb	20-30	-
	Anthrosol at Santa María system (terrace system)	Pe10/26-1	Ap	0-15	1 grain
		Pe10/26-4	C1	60-100	-
	Anthrosol at Sihuilca system (terrace system)	Pe10/31-2	Ap2	10-20	2 grains
		Pe10/31-4	Bwt	50-70	1 grain

## Sheet: Supplementary Table S3
	Supplementary Table S3: List of phytolith morphotypes identified and their frequencies (counts).
	Sample context	Sample ID	Counted phytoliths per sample	Acute bulbosus	Bulliform flabellate	Clavate	Ellipsoidal tuberculate	Elongate crenate	Elongate dentritic	Elongate echinate	Elongate entire psilate	Elongate entire scabrate	Elongate laminate	Elongate multicell	Elongate polylobate	Elongate sinuate	Elongate velloate	Elongate verrucate	Irregular blocky psilate	Irregular blocky scabrate	Oblong psilate	Blocky psilate rounded ends	Blocky psilate square ends	Blocky scabrate rounded ends	Blocky scabrate square ends	Parallelpiped elongate psilate	Parallelpiped elongate scabrate	Tabular psilate rounded ends	Tabular psilate square ends	Tabular scabrate rounded ends	Tabular scabrate square ends	Perforated platelet	Prickle	Sclereid	Bilobate	Bilobate long	Cross	Rondel	Rondel elongate/wavy top	Rondel tall	Saddle	Trapezoid	Spheroid echinate	Spheroid psilate	Spheroid scabrate	Tracheid	Trapeziform polylobate	Crenate	Unciform hair cell
	Andosol near Pucará	Pe10-32/1	535	7	4	0	0	0	0	18	47	70	0	0	1	2	2	0	9	0	0	0	0	0	1	1	2	0	0	0	0	0	32	0	61	1	4	102	29	4	5	16	1	0	0	0	39	41	0
		Pe10-32/2	437	1	1	0	0	1	0	10	43	43	0	0	0	3	7	1	2	2	0	1	1	0	0	0	0	0	0	0	0	0	11	1	15	0	4	123	33	6	0	16	1	0	0	0	12	64	0
		Pe10-32/3	509	2	2	0	0	0	0	10	40	66	0	0	0	1	3	0	9	0	0	0	2	1	2	0	0	0	0	0	0	0	23	0	11	0	0	153	19	5	0	24	0	0	0	0	15	46	0
		Pe10-32/4	562	1	3	0	0	0	1	9	34	79	0	1	0	0	3	0	2	1	0	2	1	0	3	0	0	0	0	0	0	0	32	0	19	0	0	155	25	4	1	16	0	0	0	0	11	66	0
		Pe10-32/5	700	8	0	0	0	0	0	31	39	54	0	0	0	2	1	0	0	0	0	1	0	1	2	0	0	0	0	0	0	0	17	0	25	0	0	247	28	6	11	26	0	0	0	0	72	67	0
	Anthrosol at Santa María system	Pe10-26/1	631	3	3	4	0	0	0	26	40	47	0	0	0	0	4	0	11	3	1	1	12	1	13	0	1	0	1	0	2	0	20	0	58	6	13	78	87	9	5	0	7	0	0	1	37	44	0
		Pe10-26/2	391	2	5	0	0	0	0	15	31	22	0	0	0	0	1	0	15	1	0	2	15	1	4	0	0	0	2	0	0	0	6	0	21	1	5	73	66	2	0	0	12	0	0	0	7	23	0
		Pe10-26/3	347	0	4	0	1	0	0	13	34	12	0	0	0	0	2	0	24	0	0	5	16	2	2	0	0	0	1	0	1	0	8	0	10	0	1	85	68	0	1	1	8	0	0	0	3	6	0
		Pe10-26/4	574	7	5	0	1	0	0	22	44	39	0	0	0	0	2	0	17	2	0	2	11	4	10	0	0	0	1	0	1	0	7	0	28	3	5	118	108	9	0	2	6	0	0	0	7	26	0
		Pe11-06/1	345	9	1	0	0	0	0	13	38	19	0	0	0	0	1	0	5	1	0	2	9	1	3	0	0	0	0	0	0	0	15	0	23	0	7	50	52	1	0	0	9	2	0	1	2	12	0
		Pe11-06/2	377	7	1	0	0	0	0	10	35	31	0	1	0	0	1	0	5	1	0	1	5	0	2	0	0	0	0	0	0	0	15	0	31	0	10	61	57	2	0	0	5	0	0	0	5	11	1
		Pe11-06/3	402	9	0	0	0	0	0	16	33	29	0	0	0	0	2	0	9	1	0	4	4	0	3	0	0	0	0	0	0	1	25	0	13	0	2	88	71	3	0	3	5	0	0	0	10	16	0
	Anthrosol at Ayllapampa system	Pe10-30/1	350	2	0	0	0	0	10	12	29	40	0	2	0	0	5	0	2	0	0	1	5	0	1	0	0	0	0	0	0	1	3	0	28	0	8	64	50	0	0	0	0	0	0	0	20	16	0
		Pe10-30/2	428	9	0	0	0	0	1	18	23	48	0	0	0	0	6	0	5	1	0	0	5	0	4	0	0	0	0	0	0	0	9	0	19	0	0	89	38	13	0	5	2	0	0	0	24	28	0
		Pe10-30/3	437	5	0	0	0	0	1	17	32	45	0	0	0	0	8	0	4	0	0	9	0	0	2	0	0	0	0	0	0	0	19	0	24	0	0	85	60	7	0	0	0	0	0	0	20	26	0
		Pe10-30/4	399	1	0	0	0	0	3	7	36	42	1	3	0	0	1	0	5	1	0	0	4	0	1	0	0	0	0	0	0	0	12	0	16	0	2	81	66	4	0	0	0	0	0	0	8	14	0
		Pe11-07/1	575	3	0	0	0	0	0	16	23	40	0	0	0	0	1	0	2	0	0	0	0	0	2	0	0	0	0	0	0	0	16	0	19	0	1	222	27	5	2	26	0	0	0	0	68	49	0
		Pe11-07/2	450	1	0	0	0	0	0	7	18	34	0	0	0	4	1	0	1	0	0	0	0	0	0	0	0	0	0	0	0	0	11	0	11	0	0	158	13	4	3	16	0	0	0	0	59	53	0
		Pe11-07/3	183	0	10	0	0	0	0	5	6	2	0	0	0	1	0	0	11	4	0	0	1	0	1	0	0	0	0	0	0	0	1	0	7	0	0	56	0	2	0	9	0	0	0	0	11	14	0
		Pe11-07/4	303	4	5	0	0	0	0	11	10	10	0	0	0	0	0	0	10	2	0	3	0	1	2	0	0	0	0	0	0	0	4	0	16	0	0	101	2	1	0	14	0	0	1	0	16	29	0
	Anthrosol at Sihuilca system	Pe10-31/1	502	3	1	0	0	0	0	12	50	44	0	0	1	2	0	0	20	7	0	1	7	3	5	0	0	0	0	0	0	3	3	0	35	0	2	93	78	10	0	0	0	0	0	0	16	17	0
		Pe10-31/2	338	2	0	0	0	0	0	16	24	49	0	0	0	0	1	0	20	4	0	0	2	1	3	0	0	0	0	0	0	2	9	0	19	1	0	67	35	10	0	1	0	0	0	0	6	15	0
		Pe10-31/3	385	4	14	0	0	0	0	13	38	41	0	1	0	0	1	0	3	4	0	0	0	1	6	0	0	0	0	0	0	1	11	1	16	0	0	73	62	1	0	5	0	0	0	0	14	18	0
		Pe10-31/4	390	3	5	0	0	0	0	11	24	43	0	0	0	1	2	0	6	5	0	0	1	1	2	0	0	0	0	0	0	2	29	0	19	0	1	74	64	7	0	7	0	0	0	0	8	18	0
		Pe10-31/5	370	6	1	0	0	0	0	10	35	24	0	0	0	2	1	0	6	2	0	1	0	0	3	0	0	0	0	0	0	1	16	0	8	1	0	73	45	10	0	12	0	0	0	0	12	27	0
[truncated: 1 more columns]

## Sheet: Supplementary Table S4
	Supplementary Table S4: Total number of phytoliths per gram of sediment. Phytolith amounts (percent) of selected morphotypes obtained from all samples. See also Figure 7.
	Sample context	Sample ID	Phyotliths per 1g sediment	Rondel elongated/ wavy top	Rondel tall	Bilobate long	Cross	Bilobate	Rondel	Saddle	Trapezoid	Polylobate	Crenate	Bulliform flabellate	Elongate SUM	Spheroid echinate	Acute bulbosus	Prickle	Blocky SUM	Tabular SUM	Polyhedral irregular SUM	Perforated platelet	Weathered morphotype
				[%]	[%]	[%]	[%]	[%]	[%]	[%]	[%]	[%]	[%]	[%]	[%]	[%]	[%]	[%]	[%]	[%]	[%]	[%]	[%]
	Andosol near Pucará	Pe10-32/1	11925773	5.42056	0.747664	0.186916	0.747664	11.4019	19.0654	0.934579	2.99065	7.28972	7.66355	0.747664	26.729	0.186916	1.30841	5.98131	0.186916	0	1.68224	0	6.72897
		Pe10-32/2	10756016	7.55149	1.373	0	0.915332	3.43249	28.1465	0	3.66133	2.746	14.6453	0.228833	24.714	0.228833	0.228833	2.51716	0.457666	0	0.915332	0	7.78032
		Pe10-32/3	1584117	3.73281	0.982318	0	0	2.1611	30.0589	0	4.71513	2.94695	9.03733	0.392927	23.5756	0	0.392927	4.51866	0.982318	0	1.76817	0	14.7348
		Pe10-32/4	18690	4.4484	0.711744	0	0	3.38078	27.5801	0.177936	2.84698	1.9573	11.7438	0.533808	22.5979	0	0.177936	5.69395	1.06762	0	0.533808	0	16.548
		Pe10-32/5	34792	4	0.857143	0	0	3.57143	35.2857	1.57143	3.71429	10.2857	9.57143	0	18.1429	0	1.14286	2.42857	0.571429	0	0	0	8.85714
	Anthrosol at Santa María system	Pe10-26/1	4119018	13.7876	1.42631	0.950872	2.06022	9.19176	12.3613	0.792393	0	5.86371	6.97306	0.475436	18.7005	1.10935	0.475436	3.16957	4.27892	0.475436	2.2187	0	14.7385
		Pe10-26/2	532325	16.8798	0.511509	0.255754	1.27877	5.37084	18.6701	0	0	1.79028	5.88235	1.27877	17.6471	3.06905	0.511509	1.53453	5.6266	0.511509	4.09207	0	15.0895
		Pe10-26/3	1106241	19.5965	0	0	0.288184	2.88184	24.4957	0.288184	0.288184	0.864553	1.72911	1.15274	17.5793	2.30548	0	2.30548	7.20461	0.576369	6.91643	0	11.2392
		Pe10-26/4	1175349	18.8153	1.56794	0.522648	0.87108	4.87805	20.5575	0	0.348432	1.21951	4.52962	0.87108	18.6411	1.0453	1.21951	1.21951	4.70383	0.348432	3.3101	0	15.1568
		Pe11-06/1	7326396	15.0725	0.289855	0	2.02899	6.66667	14.4928	0	0	0.57971	3.47826	0.289855	20.5797	2.6087	2.6087	4.34783	4.34783	0	1.73913	0	19.7101
		Pe11-06/2	10277195	15.1194	0.530504	0	2.65252	8.22281	16.1804	0	0	1.32626	2.91777	0.265252	20.6897	1.32626	1.85676	3.97878	2.12202	0	1.59151	0	20.9549
		Pe11-06/3	3017753	17.6617	0.746269	0	0.497512	3.23383	21.8905	0	0.746269	2.48756	3.9801	0	19.9005	1.24378	2.23881	6.21891	2.73632	0	2.48756	0.248756	13.6816
	Anthrosol at Ayllapampa system	Pe10-30/1	2446706	14.2857	0	0	2.28571	8	18.2857	0	0	5.71429	4.57143	0	28	0	0.571429	0.857143	2	0	0.571429	0.285714	14.5714
		Pe10-30/2	1560504	8.8785	3.03738	0	0	4.43925	20.7944	0	1.16822	5.60748	6.54206	0	22.4299	0.46729	2.1028	2.1028	2.1028	0	1.40187	0	18.9252
		Pe10-30/3	1778108	13.73	1.60183	0	0	5.49199	19.4508	0	0	4.57666	5.94966	0	23.5698	0	1.14416	4.34783	2.51716	0	0.915332	0	16.7048
		Pe10-30/4	1791331	16.5414	1.00251	0	0.501253	4.01003	20.3008	0	0	2.00501	3.50877	0	23.3083	0	0.250627	3.00752	1.25313	0	1.50376	0	22.807
		Pe11-07/1	2357810	4.69565	0.869565	0	0.173913	3.30435	38.6087	0.347826	4.52174	11.8261	8.52174	0	13.913	0	0.521739	2.78261	0.347826	0	0.347826	0	9.21739
		Pe11-07/2	1598754	2.88889	0.888889	0	0	2.44444	35.1111	0.666667	3.55556	13.1111	11.7778	0	14.2222	0	0.222222	2.44444	0	0	0.222222	0	12.4444
		Pe11-07/3	540265	0	1.0929	0	0	3.82514	30.6011	0	4.91803	6.01093	7.65027	5.46448	7.65027	0	0	0.546448	1.0929	0	8.19672	0	22.9508
		Pe11-07/4	168678	0.660066	0.330033	0	0	5.28053	33.3333	0	4.62046	5.28053	9.57096	1.65017	10.231	0	1.32013	1.32013	1.9802	0	3.9604	0	20.132
	Anthrosol at Sihuilca system	Pe10-31/1	2343877	15.5378	1.99203	0	0.398406	6.97211	18.5259	0	0	3.18725	3.38645	0.199203	21.7131	0	0.59761	0.59761	3.18725	0	5.37849	0.59761	17.7291
		Pe10-31/2	1338550	10.355	2.95858	0.295858	0	5.6213	19.8225	0	0.295858	1.77515	4.43787	0	26.6272	0	0.591716	2.66272	1.77515	0	7.10059	0.591716	15.0888
		Pe10-31/3	1340401	16.1039	0.25974	0	0	4.15584	18.961	0	1.2987	3.63636	4.67532	3.63636	24.4156	0	1.03896	2.85714	1.81818	0	1.81818	0.25974	14.8052
		Pe10-31/4	950881	16.4103	1.79487	0	0.25641	4.87179	18.9744	0	1.79487	2.05128	4.61538	1.28205	20.7692	0	0.769231	7.4359	1.02564	0	2.82051	0.512821	14.6154
		Pe10-31/5	1118504	12.1622	2.7027	0.27027	0	2.16216	19.7297	0	3.24324	3.24324	7.2973	0.27027	19.4595	0	1.62162	4.32432	1.08108	0	2.16216	0.27027	20
